# Supplementary material
Source: PubMed Central journal article supplement (PMC4933253)
Supplement: 10.1074_M116.728717_jbc.M116.728717-1.pdf [file 10.1074_M116.728717_jbc.M116.728717-1.pdf]

**Supplementary table 1. Primer sequences used for site directed mutagenesis:** Site directed mutagenesis primers 5'-3' forward and reverse primer sequences, template used for PCR reaction and mutant product after reaction. Nucleotide sequences in bold red letters indicate point mutations. WT= Wild Type, TM= Triple mutant, S= Serine, A= Alanine, D= Aspartate.

**Supplementary Table 1**

| Sr. No. | Mutation | Template | Primer  | Sequence (5'-3')                       | PCR Product |
|---------|----------|----------|---------|----------------------------------------|-------------|
| 1       | S29A     | K18 WT   | Forward | GGCCGGT <b>CGC</b> CAGCGCGGCCAGCG      | S29A        |
|         |          |          | Reverse | CGCTGGCCGCGCTG <b>CGC</b> ACCGGCC      |             |
| 2       | S30A     | K18 WT   | Forward | CCGGCCGGTCAGC <b>GCC</b> CGCGGCC       | S30A        |
|         |          |          | Reverse | GGCCGCG <b>CGC</b> GCTGACCGGCCGG       |             |
| 3       | S48A     | K18 WT   | Forward | CGGATCTCCGTG <b>G</b> CCCGCTCCACCA     | S48A        |
|         |          |          | Reverse | TGGTGGAGCGGG <b>C</b> CACGGAGATCCG     |             |
| 4       | A29S     | K18 TM   | Forward | CCGGCCGGTC <b>AGC</b> GCCCGCGGCC       | S30A/S48A   |
|         |          |          | Reverse | GGCCGCG <b>CGC</b> GCTGACCGGCCGG       |             |
| 5       | A30S     | K18 TM   | Forward | GGCCGGTCGCC <b>AGC</b> GCGGCCAGCG      | S29A/S48A   |
|         |          |          | Reverse | CGCTGGCCGCGCTG <b>CGC</b> ACCGGCC      |             |
| 6       | A48S     | K18 TM   | Forward | CGGATCTCCGTG <b>T</b> CCCGCTCCACCA     | S29A/S30A   |
|         |          |          | Reverse | TGGTGGAGCGGG <b>A</b> CACGGAGATCCG     |             |
| 7       | S33A     | K18 WT   | Forward | CAGCAGCGCGGCC <b>GCC</b> CGTCTATGCAGGC | S33A        |
|         |          |          | Reverse | GCCTGCATAGACG <b>GCC</b> GCCGCGCTGCTG  |             |
| 8       | S52A     | K18 WT   | Forward | GTCCCGCTCCACC <b>GCC</b> TTTCAGGGCGGC  | S52A        |
|         |          |          | Reverse | GCCGCCCTGAAG <b>CGC</b> GGTGGAGCGGGAC  |             |
| 9       | S33D     | K18 WT   | Forward | CAGCAGCGCGGCC <b>GAC</b> GTCTATGCAGGC  | S33D        |
|         |          |          | Reverse | GCCTGCATAGACG <b>GAG</b> GCCGCGCTGCTG  |             |
| 10      | S33D     | K18 S30A | Forward | CAGCAGCGCGGCC <b>GAC</b> GTCTATGCAGGC  | S30A/S33D   |
|         |          |          | Reverse | GCCTGCATAGACG <b>GAG</b> GCCGCGCTGCTG  |             |
